# Supplementary material
Source: PubMed Central journal article supplement (PMC8729835)
Supplement: ASN.2021020167SupplementaryData.pdf [file ASN.2021020167SupplementaryData.pdf]

## SUPPLEMENTAL MATERIALS

### TABLE OF CONTENTS

|                                                                                                                       |   |
|-----------------------------------------------------------------------------------------------------------------------|---|
| Figure S1. Distribution of eGFR values at baseline in patients with baseline eGFR <30 mL/min/1.73m <sup>2</sup> ..... | 2 |
| Figure S2. Forest plots for the prespecified exploratory endpoints by baseline CKD stage .....                        | 3 |
| Figure S3. Forest plots for the <i>post-hoc</i> exploratory endpoints by baseline CKD stage .....                     | 4 |

**Figure S1.** Distribution of eGFR values at baseline in patients with baseline eGFR <30 mL/min/1.73m<sup>2</sup>

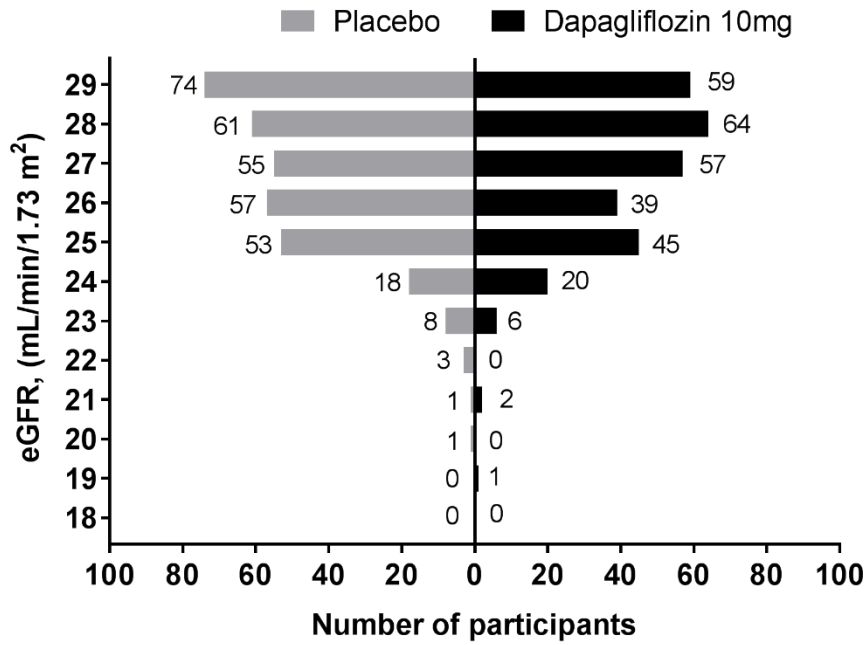

All participants whose baseline eGFR was <25 mL/min/1.73m<sup>2</sup> (n=60) had screening eGFR 25-75 mL/min/1.73m<sup>2</sup> as per the inclusion criteria.

**Figure S2.** Forest plots for the prespecified exploratory endpoints by baseline CKD stage

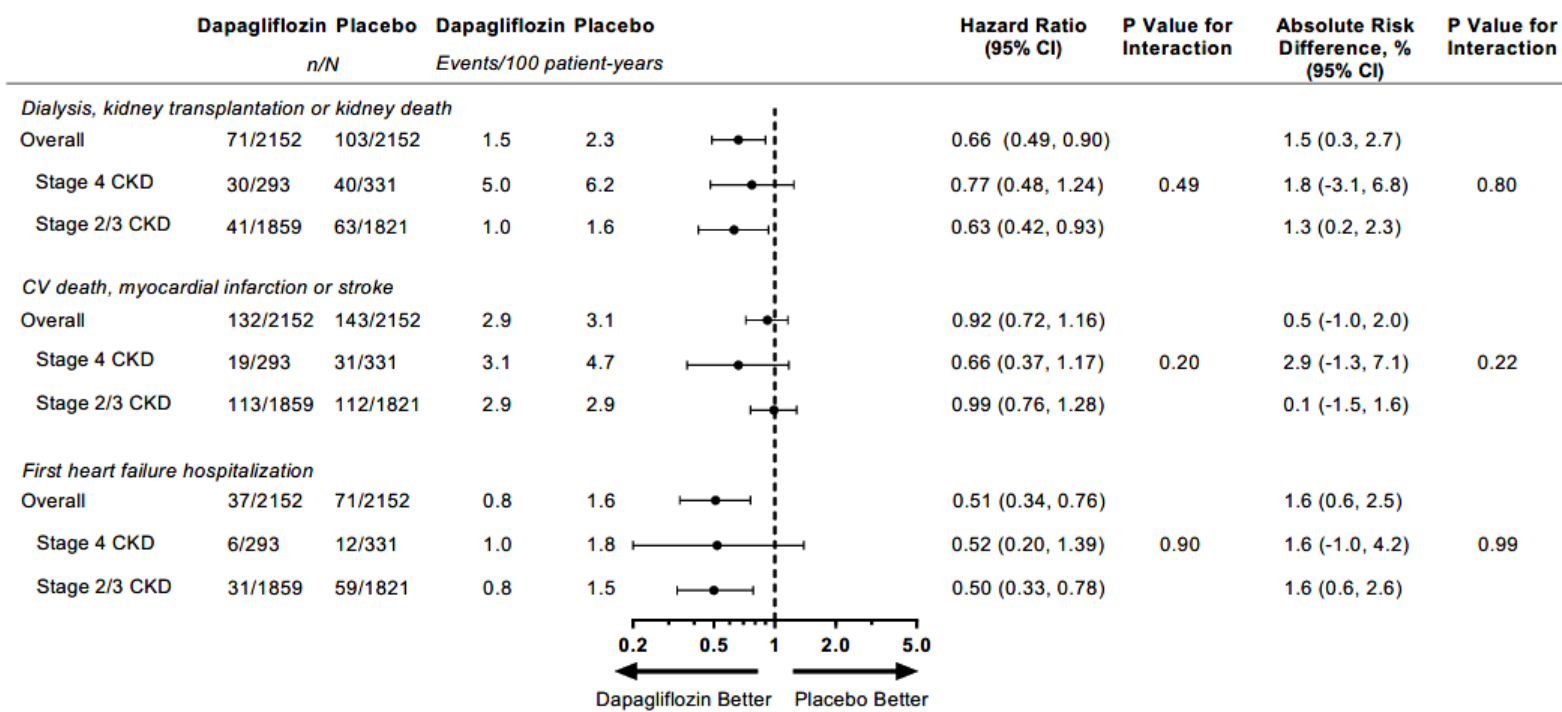

CI, confidence intervals; CV, cardiovascular; ESKD, end-stage kidney disease; n, number with events; N, total number.

**Figure S3.** Forest plots for the *post-hoc* exploratory endpoints by baseline CKD stage

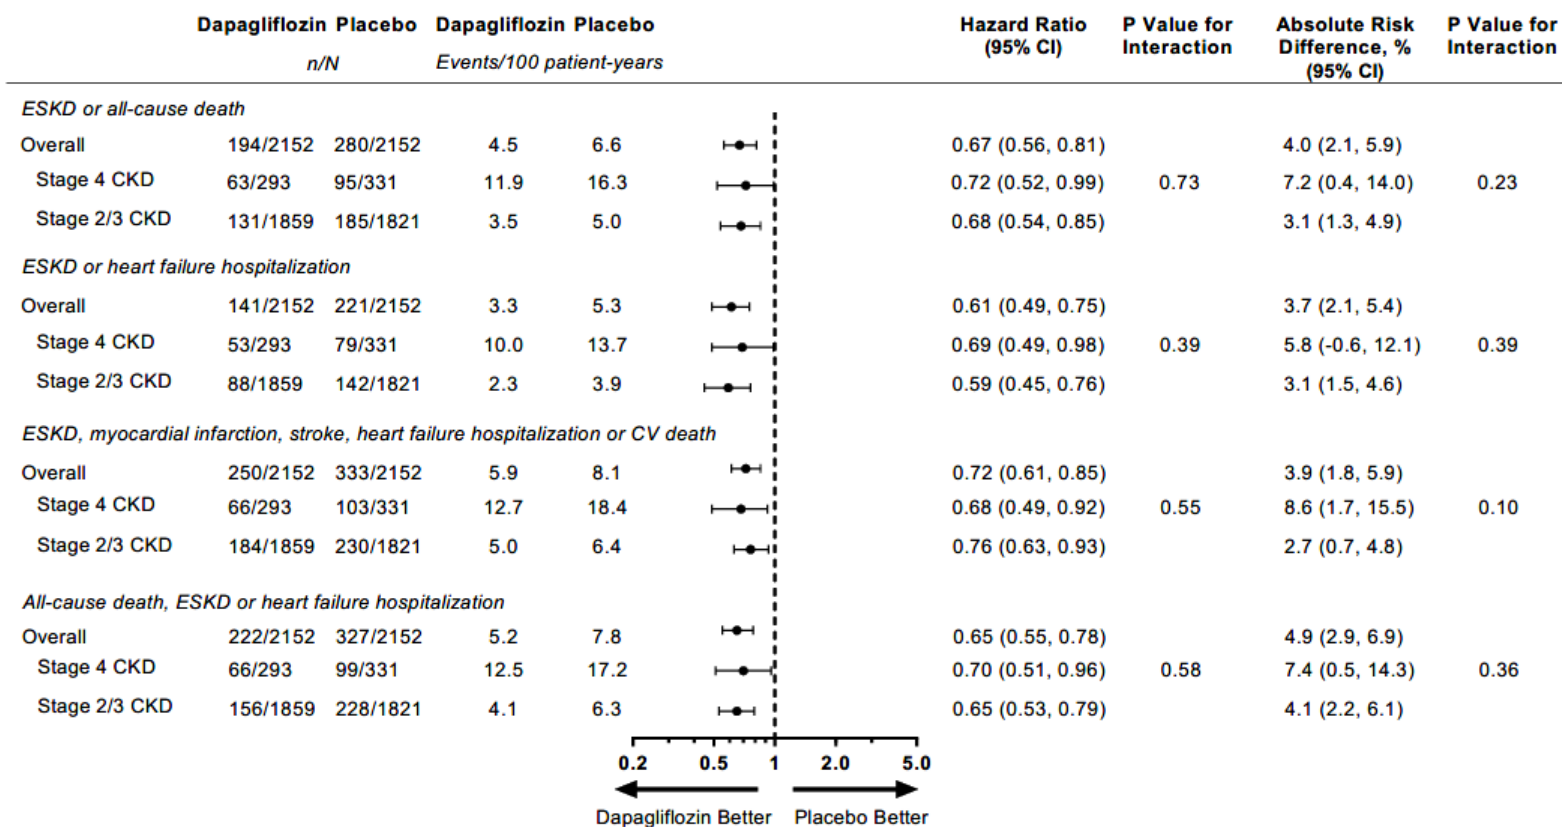

CI, confidence intervals; CV, cardiovascular; ESKD, end-stage kidney disease; n, number with events; N, total number.
